# Supplementary figures and images for: Occurrence of Giardia duodenalis in Cats from Queretaro and the Risk to Public Health
Source: MDPI journal article supplement (doi:10.3390/ani13061098), 2023-03-20

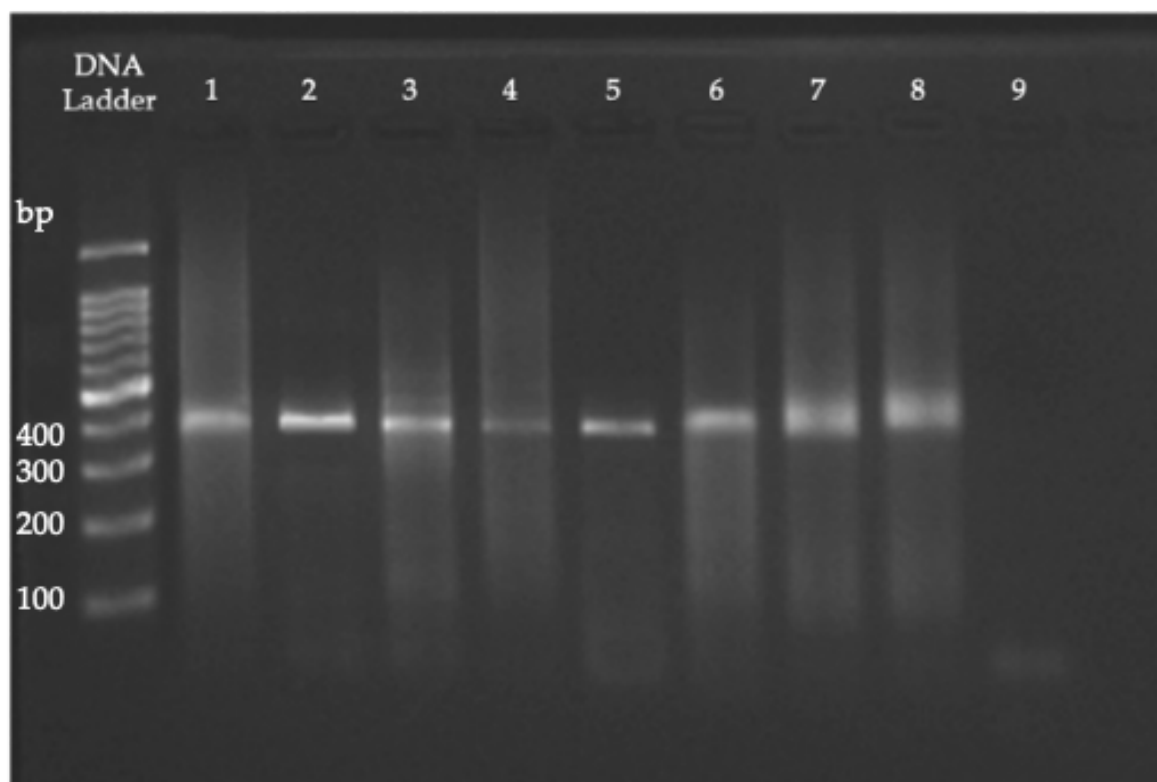

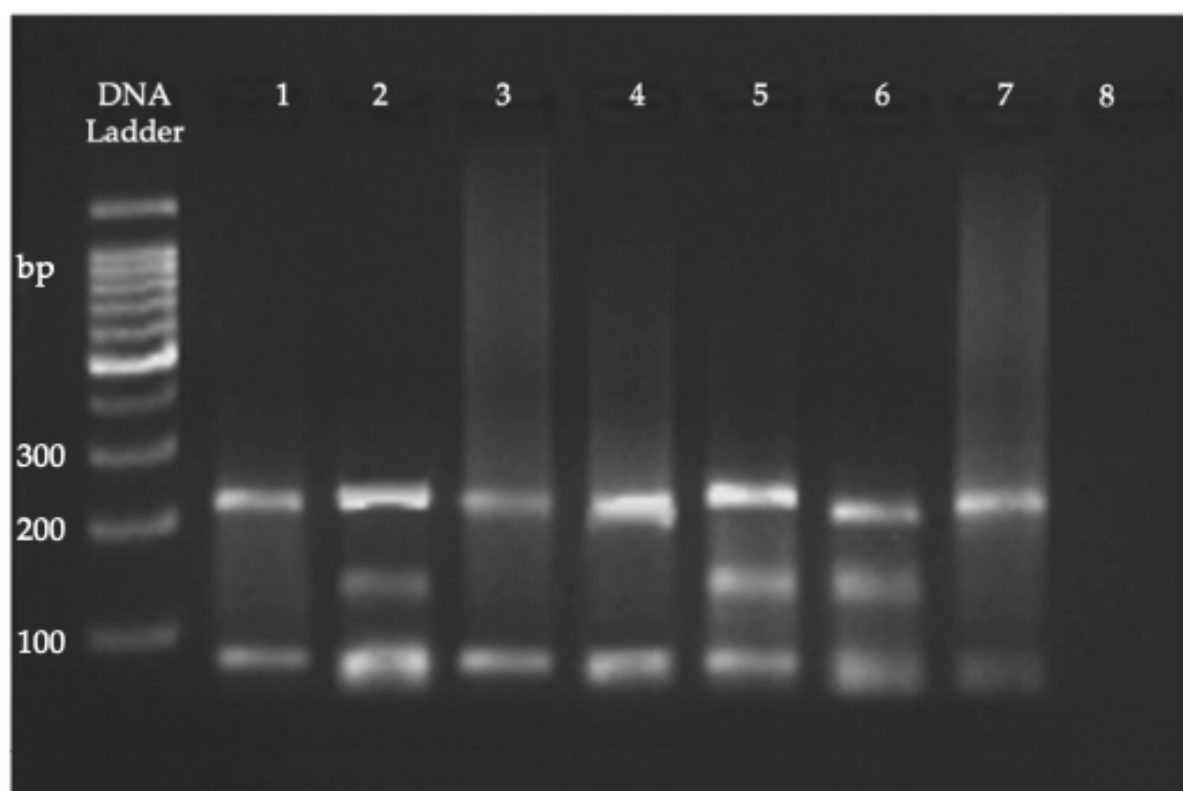

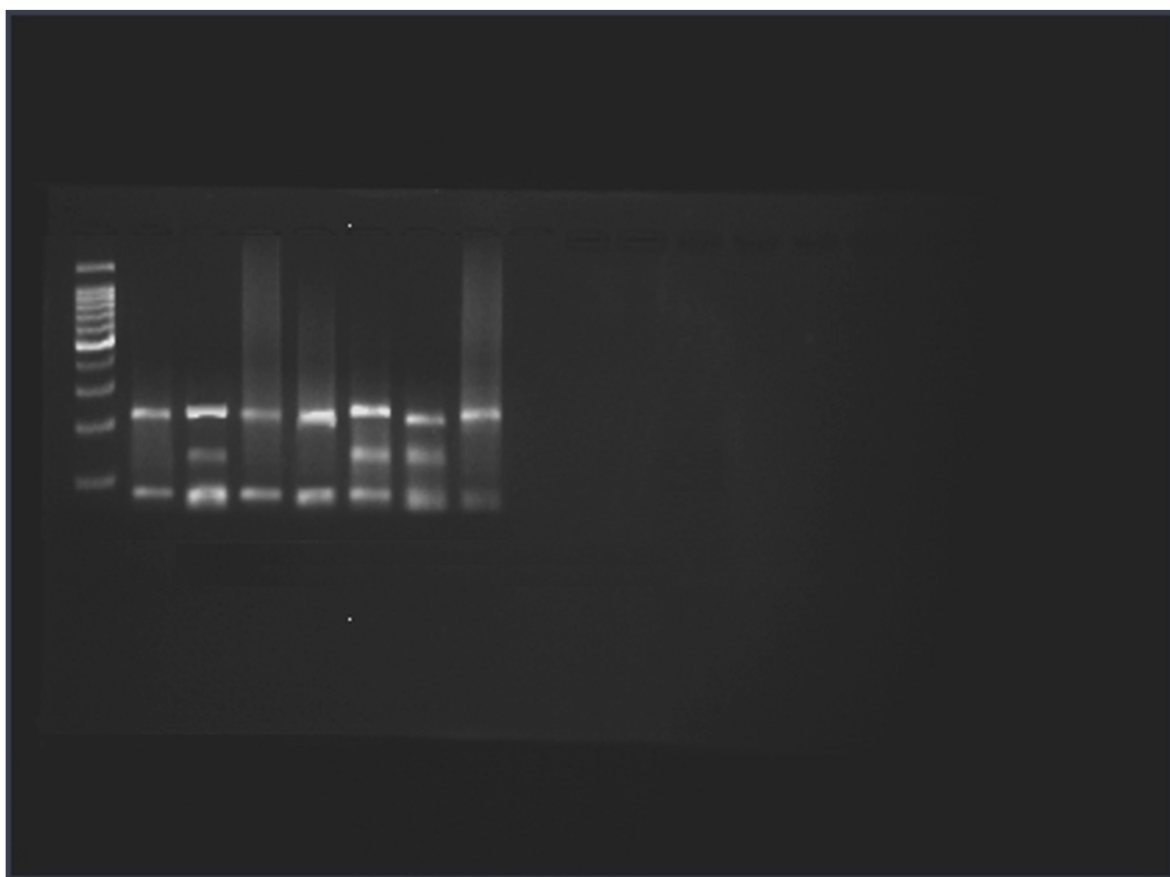

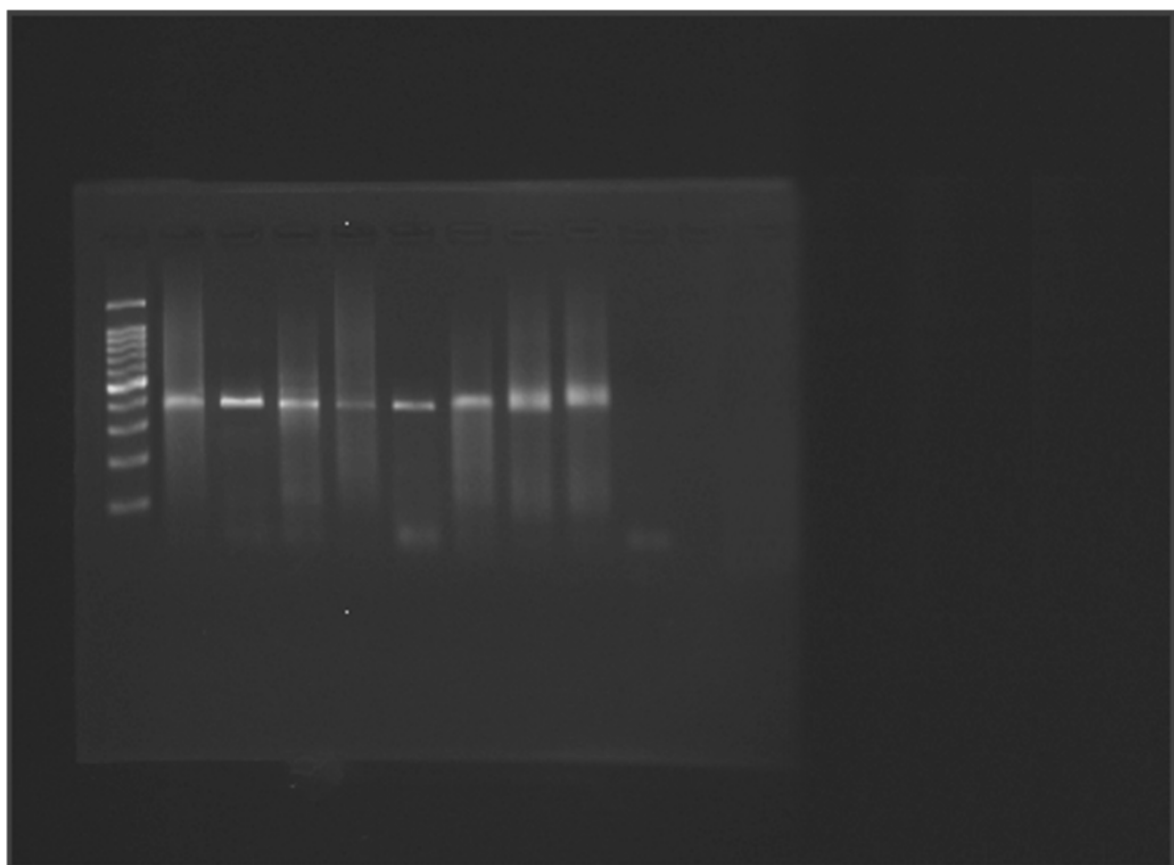

Supplement: s1 [file s1]
